# Supplementary material
Source: PubMed Central journal article supplement (PMC3859390)
Supplement: JCI71307sd.pdf [file JCI71307sd.pdf]

# Figure S1

## A

### Tissue Fungal Burden

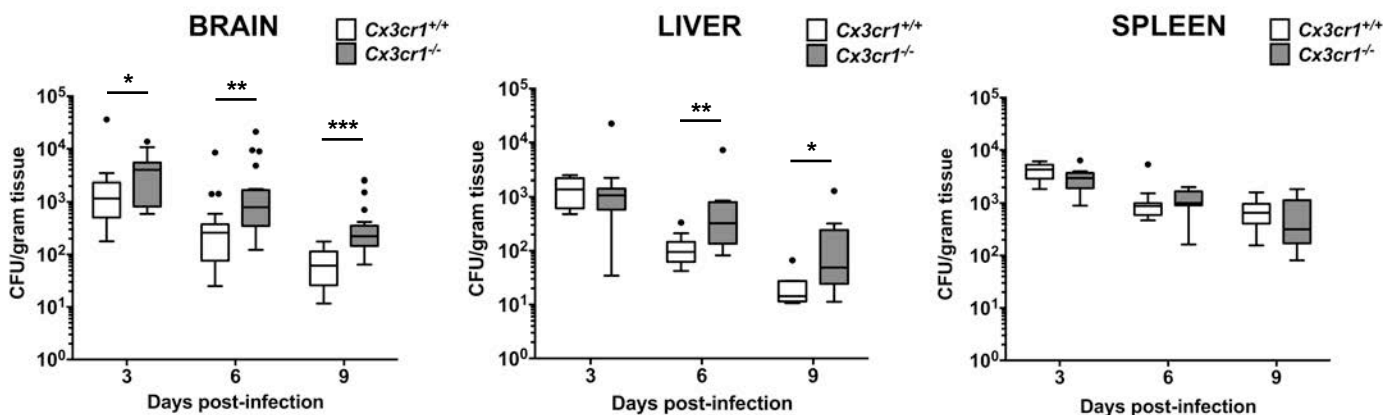

## B

### BRAIN

### LIVER

### SPLEEN

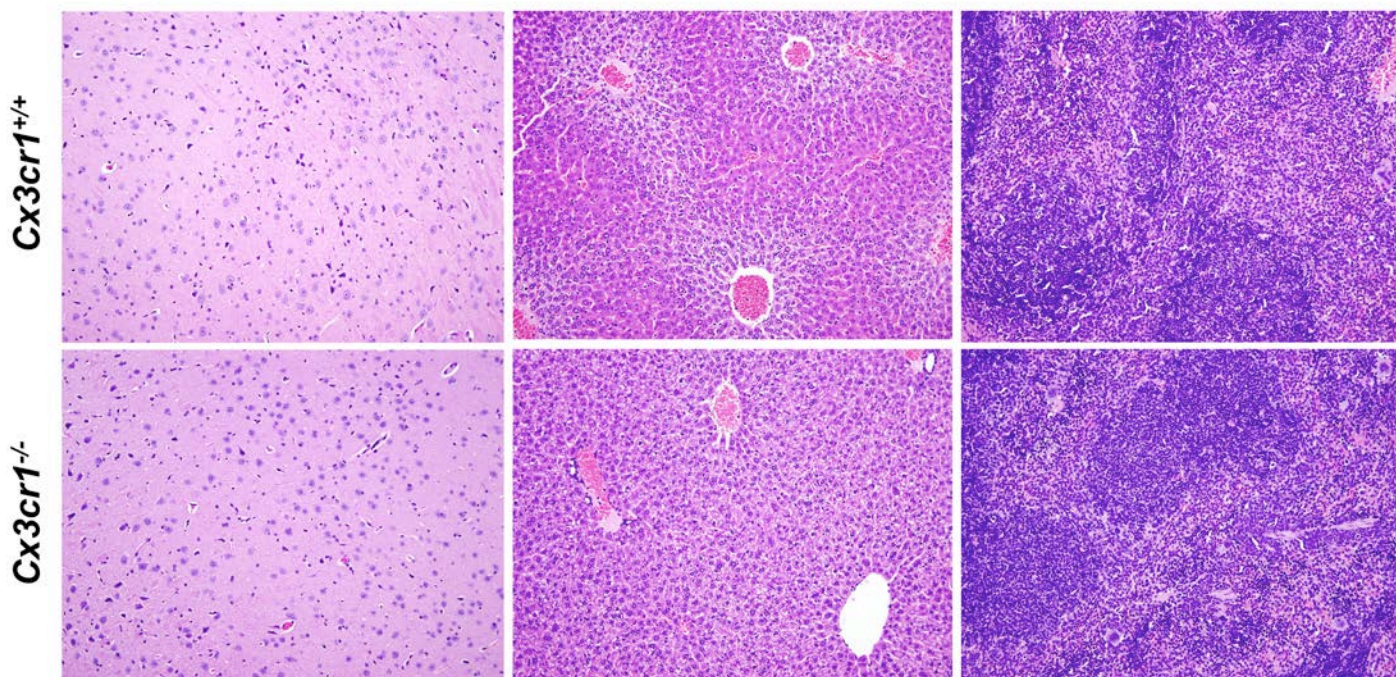

**Figure S1. Tissue fungal burden and histology in brain, liver and spleen of *Candida*-infected WT and *Cx3cr1*<sup>-/-</sup> mice. (A) Fungal burden. \**P* < 0.05; \*\**P* < 0.01; \*\*\**P* < 0.0001 (*n* = 10-21; two to three independent experiments). (B) Hematoxylin and Eosin staining (day 6 post-infection). Magnification, 200× (*n* = 8; two independent experiments).**

## Figure S2

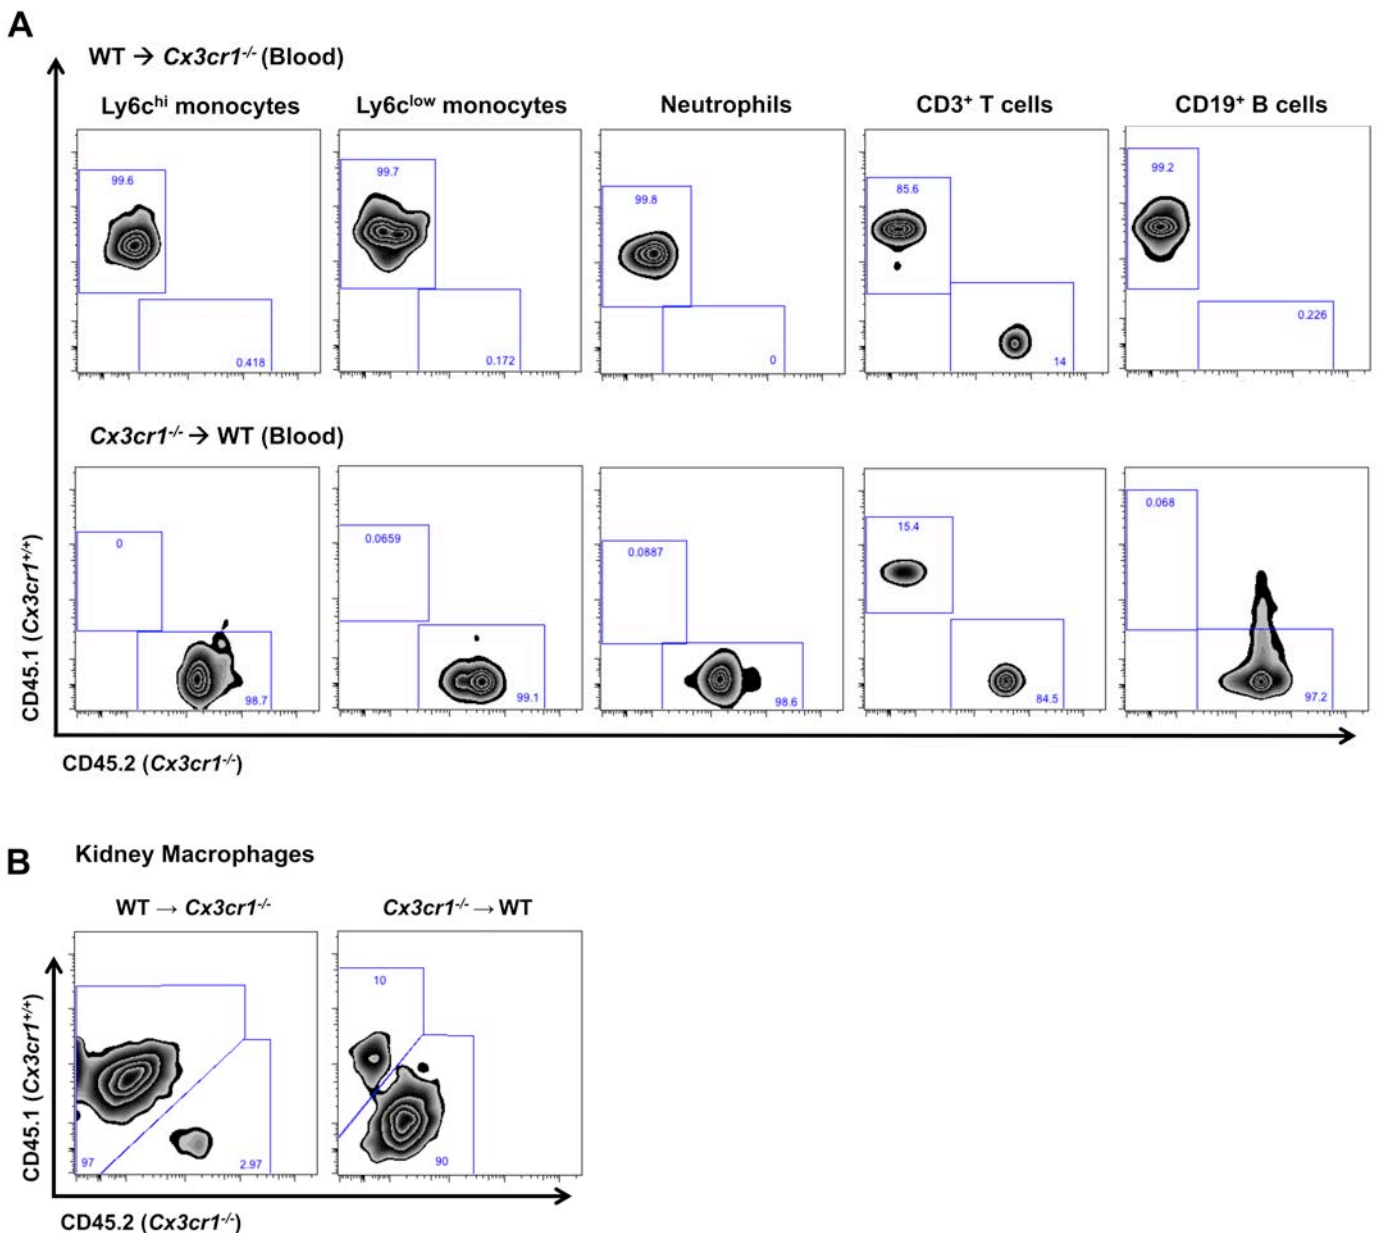

**Figure S2. Engraftment of bone-marrow radiation chimeras before *Candida* infection.** Whole bone marrow cells from WT (CD45.1<sup>+</sup>) and *Cx3cr1*<sup>-/-</sup> (CD45.2<sup>+</sup>) congenic mice were cross-transferred to irradiated recipients and evaluated for engraftment 8 weeks later. (A) Blood. Each column of FACS plots corresponds to the subpopulation labeled at the top, analyzed for CD45.1 and CD45.2 expression. WT donor→*Cx3cr1*<sup>-/-</sup> recipient mice (upper panel); *Cx3cr1*<sup>-/-</sup> donor→WT recipient mice (lower panel). Data are representative of 25 mice per group. (B) Kidney macrophages. FACS plots of kidney leukocytes purified from the indicated chimeric mice and gated on MHCII<sup>hi</sup>F4/80<sup>hi</sup>CD11b<sup>+</sup> cells. Data are representative of 4 mice.

**Figure S3**

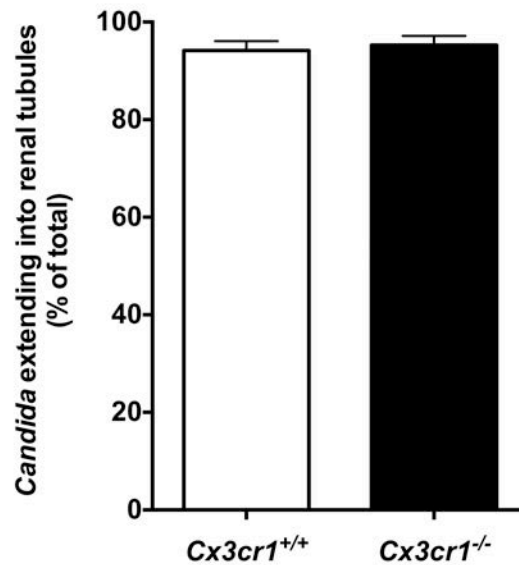

**Figure S3. *Candida* pseudohyphae rapidly extend into the renal collecting system by 24 hours after infection.** Percent of *Candida* pseudohyphal structures that have extended into renal tubules at day 1 post-infection in Cx3cr1<sup>+/+</sup> and Cx3cr1<sup>-/-</sup> mice ( $n = 11-13$ ; two independent experiments;  $P = 0.68$ ).

**Figure S4**

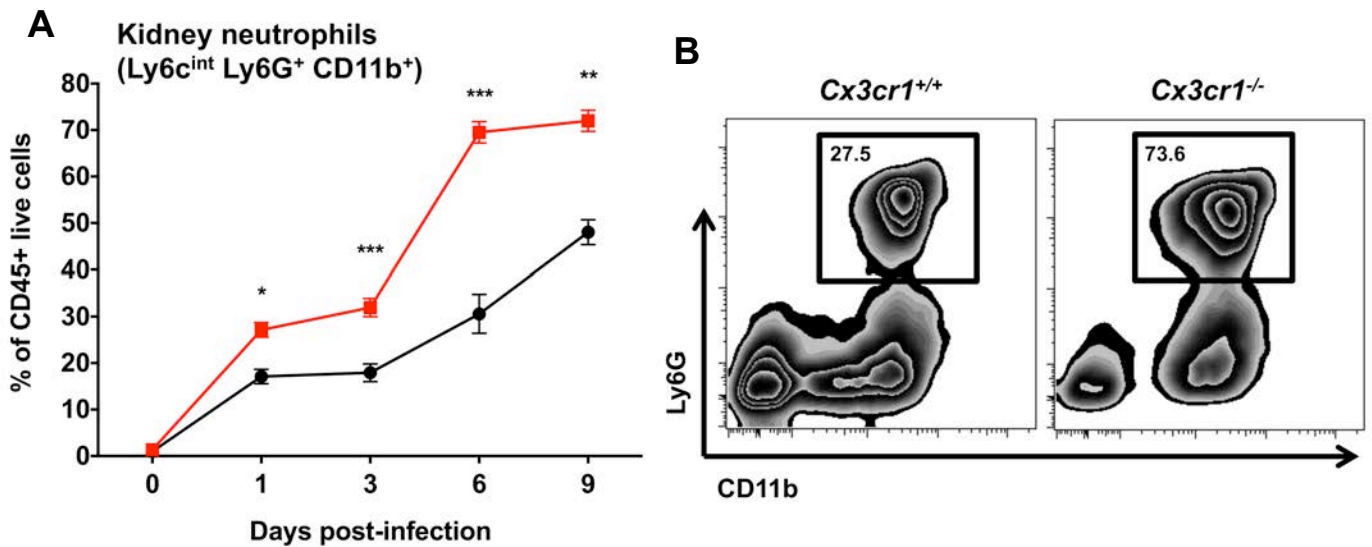

**Figure S4. *Cx3cr1* deficiency results in increased accumulation of neutrophils in the kidney after *Candida* infection.** (A) Percent of total CD45<sup>+</sup> leukocytes represented by Ly6c<sup>int</sup>Ly6G<sup>+</sup>CD11b<sup>+</sup> neutrophils that accumulated in *Cx3cr1*<sup>+/+</sup> and *Cx3cr1*<sup>-/-</sup> kidneys at different time-points after infection. \**P* < 0.01; \*\**P* < 0.001; \*\*\**P* < 0.0001 (*n* = 9-15; three to four independent experiments). (B) Representative FACS plots demonstrating increased frequency of Ly6c<sup>int</sup>Ly6G<sup>+</sup>CD11b<sup>+</sup> neutrophils in *Cx3cr1*<sup>-/-</sup> kidneys at day 6 post-infection (*n* = 9-15; three to four independent experiments).

Figure S5

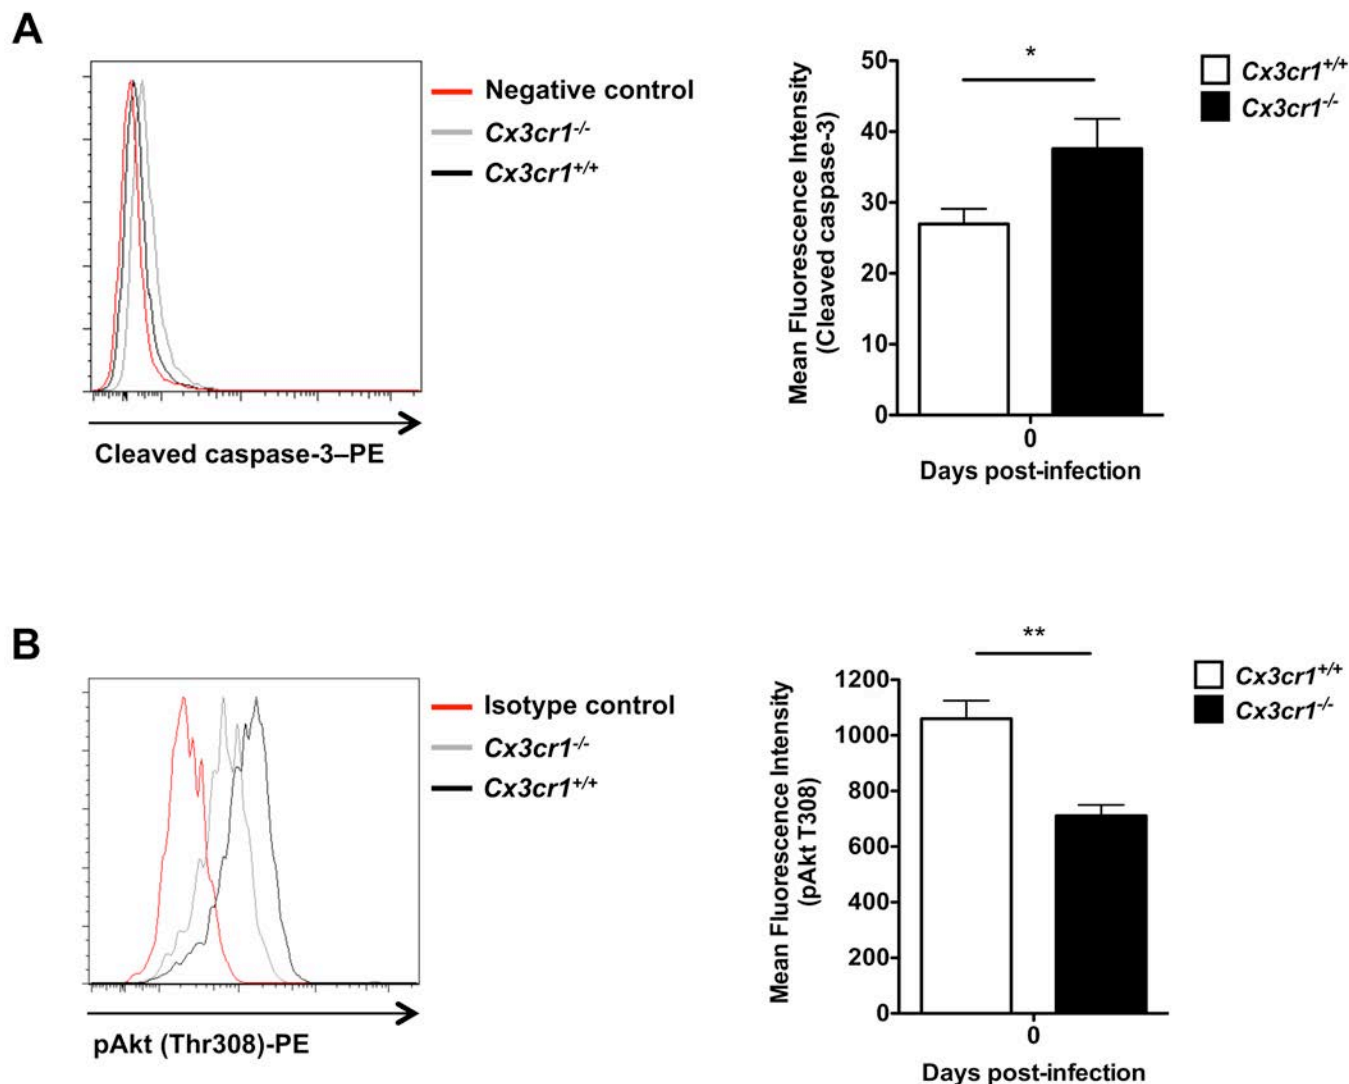

**Figure S5. *Cx3cr1* deficiency is associated with increased caspase-3 cleavage and decreased Akt phosphorylation in kidney resident macrophages.** (A) Decreased expression of cleaved caspase-3 in *Cx3cr1*<sup>+/+</sup> kidney resident macrophages from uninfected mice. Left, representative FACS histogram. Right, summary mean fluorescence intensity data obtained by FACS. \**P*<0.05 (*n* = 9; three independent experiments). (B) Increased expression of pAKT (Thr308) in *Cx3cr1*<sup>+/+</sup> kidney resident macrophages from uninfected mice. Left, representative FACS histogram. Right, mean fluorescence intensity data obtained by FACS. \*\**P*<0.01 (*n* = 6). Data are shown from one of two independent experiments with similar pattern of results. All quantitative data are mean ± SEM.

**Table S1. Relative abundance of leukocyte subsets and their Cx3cr1 expression in the kidney at steady state and after *Candida* infection.**

| Leukocyte subset* | % of total CD45 <sup>+</sup> leukocytes** |       |       |       |       | % of total Cx3cr1 <sup>+</sup> leukocytes*** |       |       |
|-------------------|-------------------------------------------|-------|-------|-------|-------|----------------------------------------------|-------|-------|
|                   | Day post-infection                        |       |       |       |       |                                              |       |       |
|                   | 0                                         | 1     | 3     | 6     | 9     | 0                                            | 3     | 6     |
| Neutrophils       | 0.5-1                                     | 12-21 | 14-28 | 17-61 | 25-60 | N/A                                          | N/A   | N/A   |
| Monocytes         | 3-5                                       | 35-39 | 12-39 | 4-11  | 4-10  | 6-15                                         | 21-30 | 11-17 |
| Macrophages       | 53-67                                     | 16-21 | 25-47 | 26-47 | 15-33 | 77-87                                        | 55-65 | 62-69 |
| Dendritic cells   | 9-12                                      | 7-14  | 4-9   | 3-11  | 2-5   | 3-7                                          | 9-13  | 10-14 |

N/A, not applicable

\* Neutrophils were defined as Ly6C<sup>int</sup>Ly6G<sup>+</sup>CD11b<sup>+</sup> cells, monocytes were defined as MHCII<sup>-</sup>F4/80<sup>int</sup>CD11c<sup>-</sup>CD11b<sup>+</sup> cells, macrophages were defined as MHCII<sup>hi</sup>F4/80<sup>hi</sup>CD11c<sup>low</sup>CD11b<sup>+</sup> cells, and dendritic cells were defined as MHCII<sup>hi</sup>CD11c<sup>hi</sup>F4/80<sup>low</sup> cells.

\*\* Range based on 9-15 animals tested (three to four independent experiments).

\*\*\* Range based on 4-6 animals tested (two independent experiments).

**Table S2. Number of candidemic subjects and non-infected controls from the two patient cohorts analyzed in the present study.**

|                         | <b>Candidemia<br/>Cases<br/>n = 281</b> | <b>Non-infected<br/>Controls<br/>n = 384</b> | <b>Total</b> |
|-------------------------|-----------------------------------------|----------------------------------------------|--------------|
| <b>RUNMC</b>            |                                         |                                              |              |
| <b>Caucasian</b>        | 37                                      | 167                                          | 204          |
| <b>DUMC</b>             |                                         |                                              |              |
| <b>Caucasian</b>        | 166                                     | 156                                          | 322          |
| <b>African American</b> | 78                                      | 61                                           | 139          |
|                         |                                         |                                              | 665          |

RUNMC, Radboud University Nijmegen Medical Center; DUMC, Duke University Hospital

**Table S3. Demographic and clinical characteristics of DUMC subjects**

|                                                           | No Systemic Candidiasis<br>n = 217 | Systemic Candidiasis<br>n = 244   | p value |
|-----------------------------------------------------------|------------------------------------|-----------------------------------|---------|
| Male gender                                               | 112 (51.6%)                        | 136 (55.7%)                       | 0.376   |
| Mean Age (years)<br>adult (n = 443)<br>pediatric (n = 18) | 58.7 (56.4-60.9)<br>--             | 52.5 (54.0-58.3)<br>6.7 (3.6-9.9) | 0.11    |
| Solid organ transplant                                    | 6 (2.8%)                           | 35 (14.3%)                        | <0.0001 |
| Malignancy                                                | 49 (22.6%)                         | 69 (28.3%)                        | 0.162   |
| Chemotherapy                                              | 26 (12.0%)                         | 37 (15.2%)                        | 0.321   |
| Neutropenia                                               | 6 (2.8%)                           | 23 (9.4%)                         | 0.0033  |
| Surgery within last 30 days                               | 121 (55.8%)                        | 111 (45.7%)                       | 0.0310  |
| Receipt of total parenteral nutrition                     | 7 (3.2%)                           | 50 (21.1%)                        | <0.0001 |
| HIV                                                       | 0                                  | 3 (1.2%)                          | 0.251*  |
| Dialysis-dependent                                        | 16 (7.4%)                          | 29 (12.1%)                        | 0.089   |
| Acute renal failure                                       | 49 (22.6%)                         | 84 (34.6%)                        | 0.0047  |
| Immunocompromised state                                   | 95 (43.8%)                         | 140 (57.6%)                       | 0.0031  |
| ICU admission within past 14 days                         | 67 (30.9%)                         | 118 (49.6%)                       | <0.0001 |
| Liver disease                                             | 9 (4.3%)                           | 58 (23.8%)                        | <0.0001 |
| <i>Candida</i> spp.                                       | N/A                                |                                   |         |
| <i>albicans</i>                                           |                                    | 109 (44.7%)                       |         |
| <i>glabrata</i>                                           |                                    | 64 (26.2%)                        |         |
| <i>parapsilosis</i>                                       |                                    | 40 (16.4%)                        |         |
| <i>tropicalis</i>                                         |                                    | 27 (11.1%)                        |         |
| <i>krusei</i>                                             |                                    | 9 (3.7%)                          |         |
| other                                                     |                                    | 12 (4.9%)                         |         |
| >1 <i>Candida</i> spp.                                    |                                    | 14 (5.8%)                         |         |

\*Fishers Exact p value

DUMC, Duke University Hospital; ICU, intensive care unit



**Table S4. Association of the mutant CX<sub>3</sub>CR1-M280 allele with susceptibility to systemic candidiasis in African-American subjects**

|                | <b>No Systemic<br/>Candidiasis<br/>n = 61</b> | <b>Systemic<br/>Candidiasis<br/>n = 78</b> | <b>p value</b> | <b>OR (95% CI)</b>  |
|----------------|-----------------------------------------------|--------------------------------------------|----------------|---------------------|
| <i>CC</i>      | 47(77.1%)                                     | 65 (83.3%)                                 | 0.354          | 0.671 (0.289-1.560) |
| <i>CT + TT</i> | 14 (23.9%)                                    | 13 (16.7%)                                 |                |                     |

**Table S5. Sequences of the primers used for qPCR with SYBR Green in the present study.**

| <b>Gene product</b> | <b>Primer name<sup>*</sup></b> | <b>Primer sequence<br/>(5' → 3')</b> | <b>Amplicon<br/>length (bp)</b> |
|---------------------|--------------------------------|--------------------------------------|---------------------------------|
| Gapdh               | Gapdh F                        | aactttggcattgtggaagg                 | 223                             |
|                     | Gapdh R                        | acacattgggggtaggaaca                 |                                 |
| Cxcr2               | Cxcr2 F                        | gggtggggagttcgtgtagaa                | 201                             |
|                     | Cxcr2 R                        | cgaggtgctaggattgagc                  |                                 |
| Cxcl1               | Cxcl1 F                        | gctgggattcacctcaagaa                 | 180                             |
|                     | Cxcl1 R                        | tctccgttacttggggacac                 |                                 |
| Cxcl2               | Cxcl2 F                        | aagtttgccttgaccctgaa                 | 180                             |
|                     | Cxcl2 R                        | aggcacatcaggtagatcc                  |                                 |
| Il-4                | Il-4 F                         | cctcacagcaacgaagaaca                 | 155                             |
|                     | Il-4 R                         | atcgaaaagcccgaagagt                  |                                 |

\*F, forward; R, reverse.

Taqman primers and probes for Gapdh, Il-1 $\beta$ , Il-6, Ccr2, Cx3cr1 and Cx3cl1 were purchased from Applied Biosystems and their sequences are not available.
